# Supplementary material
Source: HighWire-hosted journal article supplement (https://bjsm.bmj.com/content/52/2/128)

**Supplementary File 2** Forest plot of return to sport rates in elite soccer players.

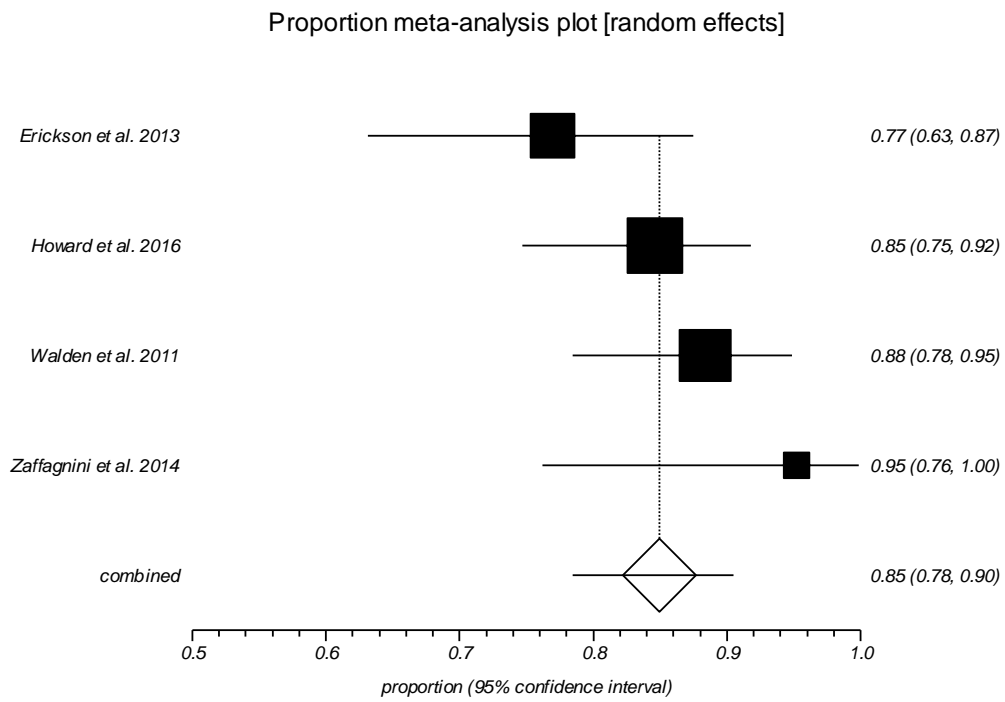

Supplement: inline-supplementary-material-2 [file inline-supplementary-material-2.pdf]

**Supplementary File 3** Forest plot of return to sport rates in elite American football players.

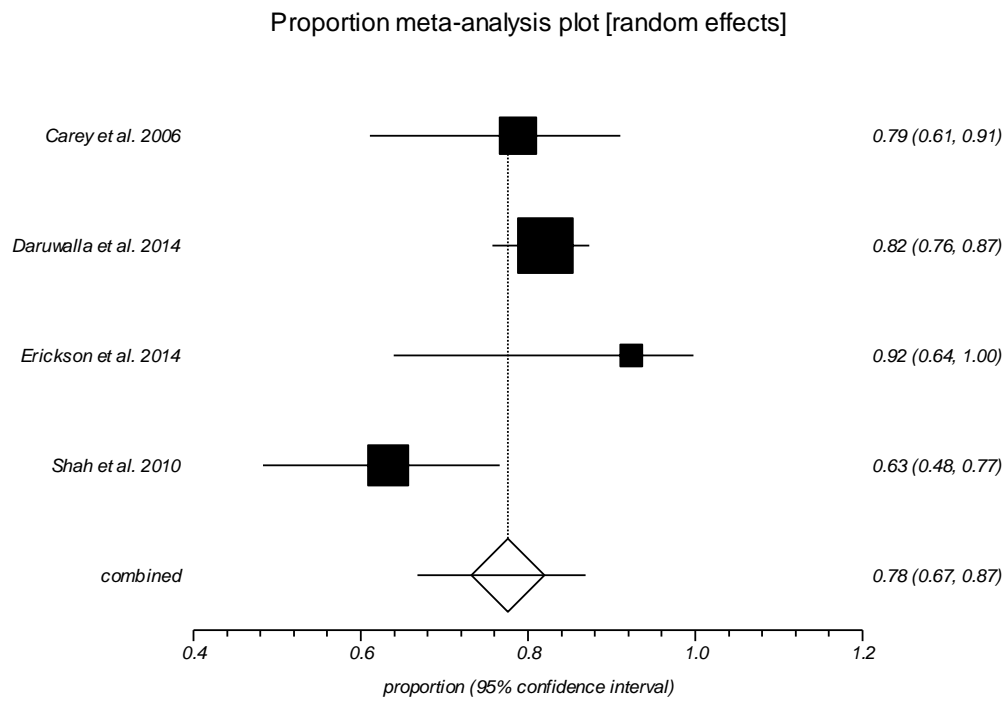

Supplement: inline-supplementary-material-3 [file inline-supplementary-material-3.pdf]

**Supplementary File 4** Forest plot of return to sport rates in elite basketball players.

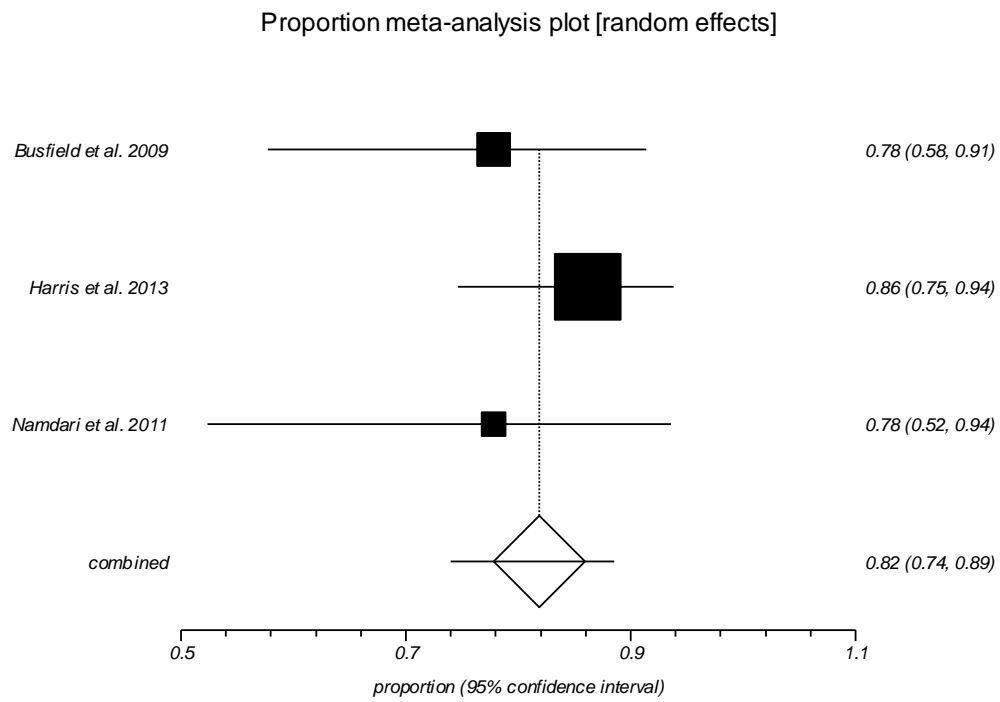

Supplement: inline-supplementary-material-4 [file inline-supplementary-material-4.pdf]
